# Supplementary material for: Nitrosative modifications of the Ca2+ release complex and actin underlie arthritis-induced muscle weakness
Source: PubMed Central journal article supplement — Ann Rheum Dis. 2014 May 19;74(10):1907–14. doi: 10.1136/annrheumdis-2013-205007 (PMC4602262; doi:10.1136/annrheumdis-2013-205007), 2014-05-19
Supplement: annrheumdis-2013-205007-s1.pdf [file annrheumdis-2013-205007-s1.pdf]

## Online supplementary Figure S1

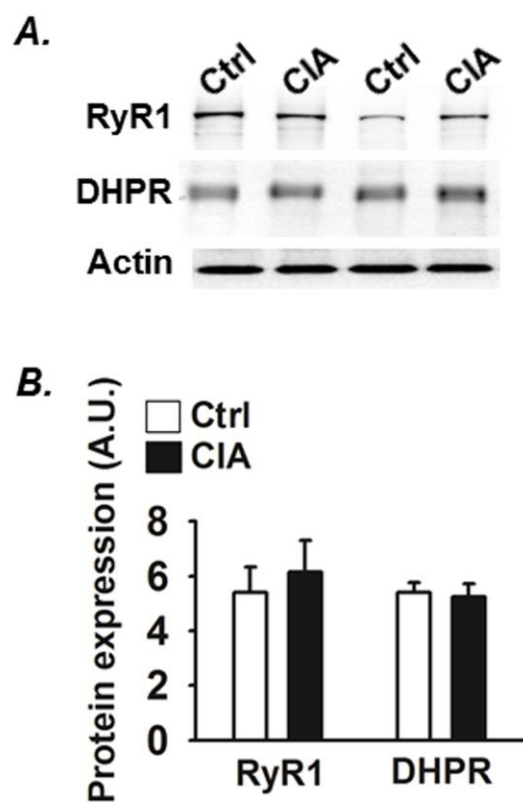

**Figure S1. Expression of total RyR1 and DHPR protein in muscles from CIA and control mice.** A. Representative Western blot of levels of RyR1 and DHPR in muscles from CIA and control mice. B. Mean levels ( $\pm$  SEM) of RyR1 and DHPR were quantified and normalized to actin content. 5-7 muscles per group.

## Online supplementary Figure S2

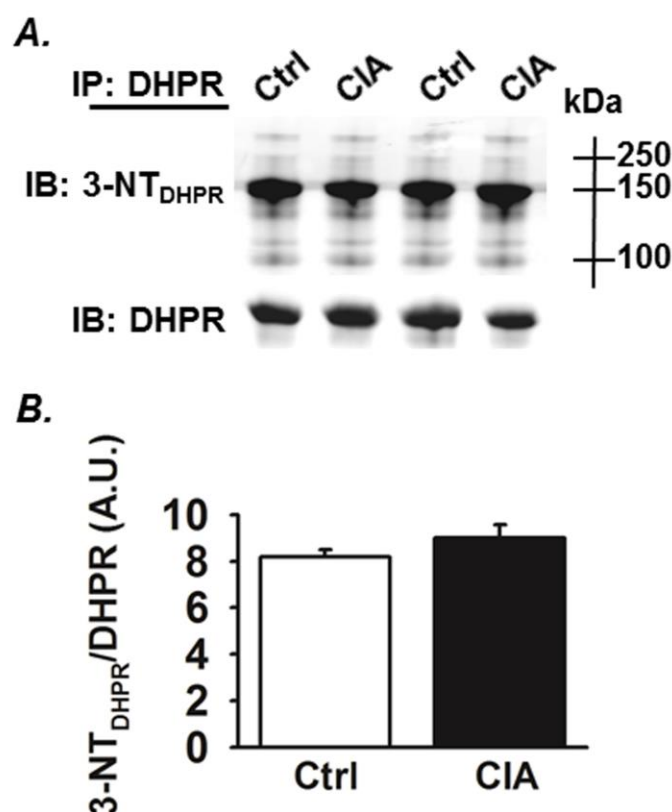

**Figure S2. 3-NT modifications on DHPR in muscles from CIA or control mice.** **A.** Representative 3-NT Western blots of DHPR ( $\alpha$ 2-subunit) immunoprecipitates from muscles of CIA and control mice as indicated. **B.** Mean data ( $\pm$ SEM; proteins larger than  $\sim$  90 kDa were quantified) of 3-NT normalized to DHPR (n=5-6).

The immunoprecipitation started from 300  $\mu$ g lysate incubated at 4°C overnight with anti-DHPR ( $\alpha$ 2-subunit) antibody in 300  $\mu$ l homogenisation buffer (see Method section). The immune complexes were incubated with Dynabeads Protein G (Invitrogen) for 2 h at 4°C, after which the beads were washed three times with 100 mM Na-acetate solution (pH 5.0). Proteins were separated by electrophoresis and immunoblots were performed as described in Method section and quantified relative to DHPR expression.

## Online supplementary Figure S3

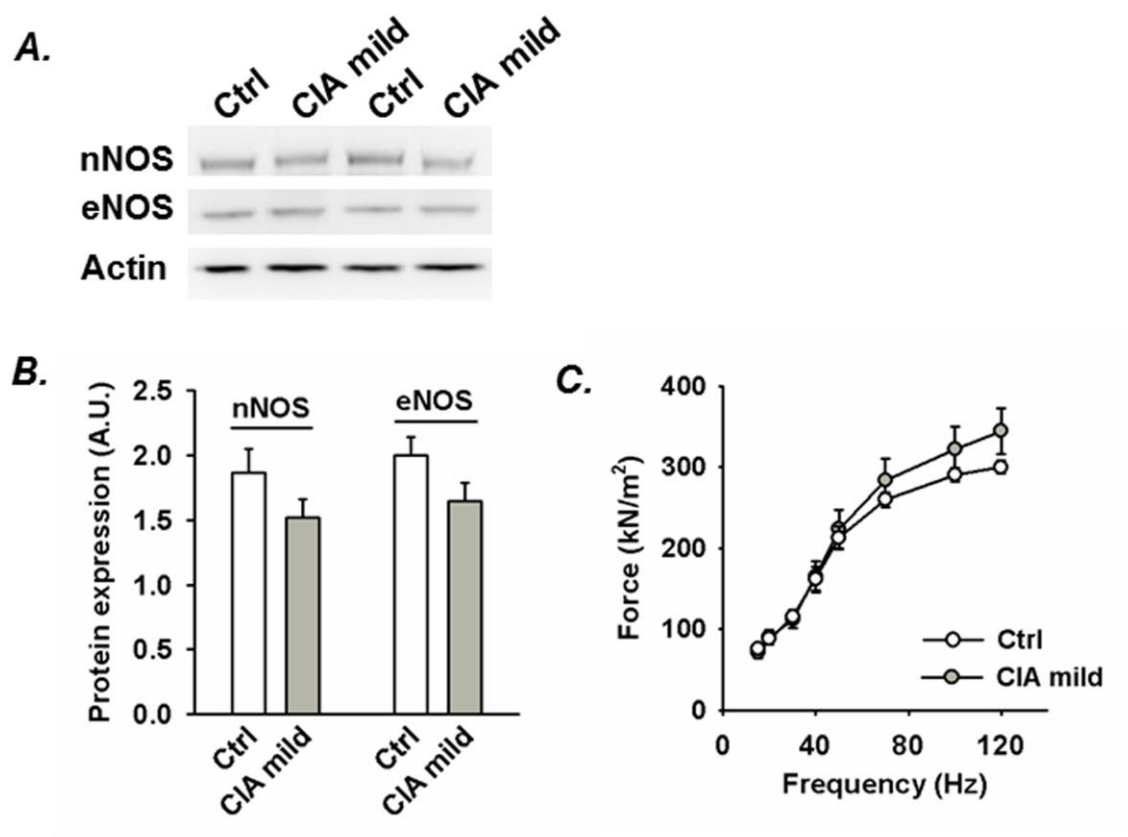

**Figure S3. nNOS levels and force production in muscles from mice with mild arthritis do not differ from healthy controls.** **A.** Representative Western blots of nNOS and eNOS in mouse muscles from CIA mice with mild arthritis (CIA mild, score 0-1) and healthy controls. **B.** Mean levels (±SEM) of nNOS and eNOS expression normalized to the actin content (6 muscles per group). **C.** Force per cross-sectional area in fast-twitch muscles from CIA mice with mild arthritis and controls. Data are mean ±SEM (n=6). No difference in force production was observed between groups.

## Online supplementary Figure S4

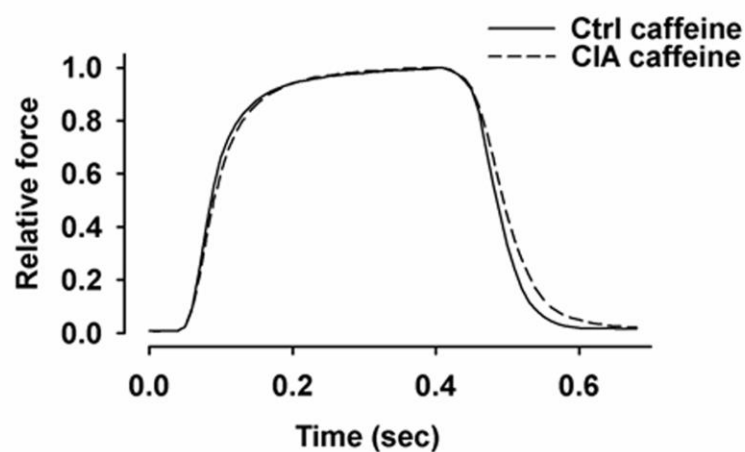

**Figure S4. The rates of tetanic activation and relaxation were lower in CIA than in control muscle.** Average force records from maximal tetanic contractions (i.e. 120 Hz stimulation in the presence of 5 mM caffeine) in FDB fibers of CIA (dashed line) and control (full line) mice (n=6 in both groups). The maximal force in each contraction was set to 1.0. Fibers of CIA mice showed lower rates of activation ( $K_{Act}$ :  $21.8 \pm 0.8$  vs.  $25.7 \pm 0.9$   $s^{-1}$ ) and relaxation ( $K_{relax}$ :  $16.2 \pm 1.4$  vs.  $22.9 \pm 1.3$   $s^{-1}$ ) than control fibers.

## Online supplementary Figure S5

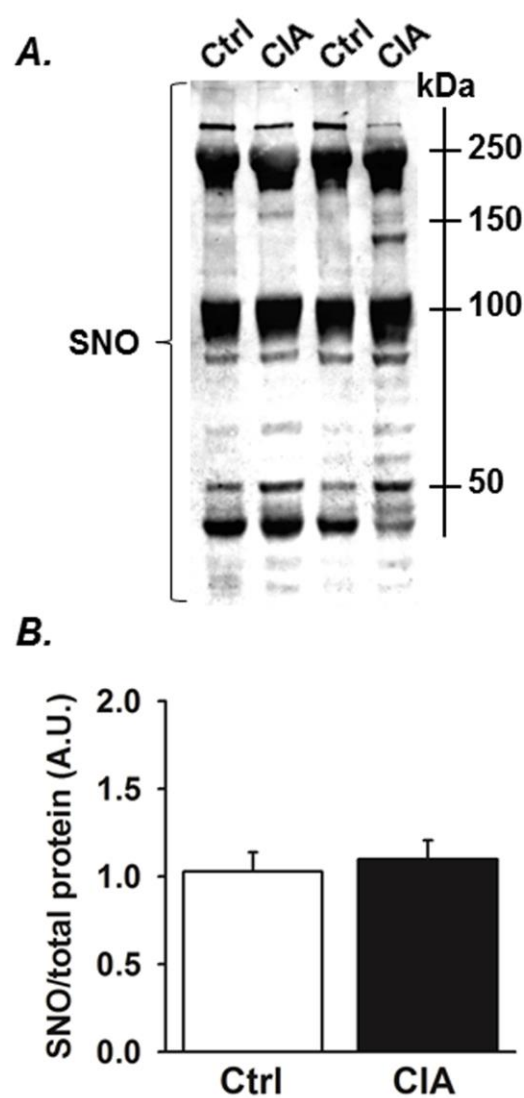

**Figure S5. The extent of S-nitrosylation of cysteine residues (SNO) is similar in muscles from CIA and control mice.** **A.** Representative Western blots of SNO modifications on proteins from muscles of CIA and control mice. **B.** Mean levels ( $\pm$  SEM) of SNO quantified and normalized to total protein content. 5-7 muscles per group. Experiments were performed in the absence of reducing agents.
